# Supplementary material for: Microbial Composition of Water Kefir Grains and Their Application for the Detoxification of Aflatoxin B1
Source: MDPI journal article supplement (doi:10.3390/toxins16020107), 2024-02-15
Supplement: s1 [file s1]

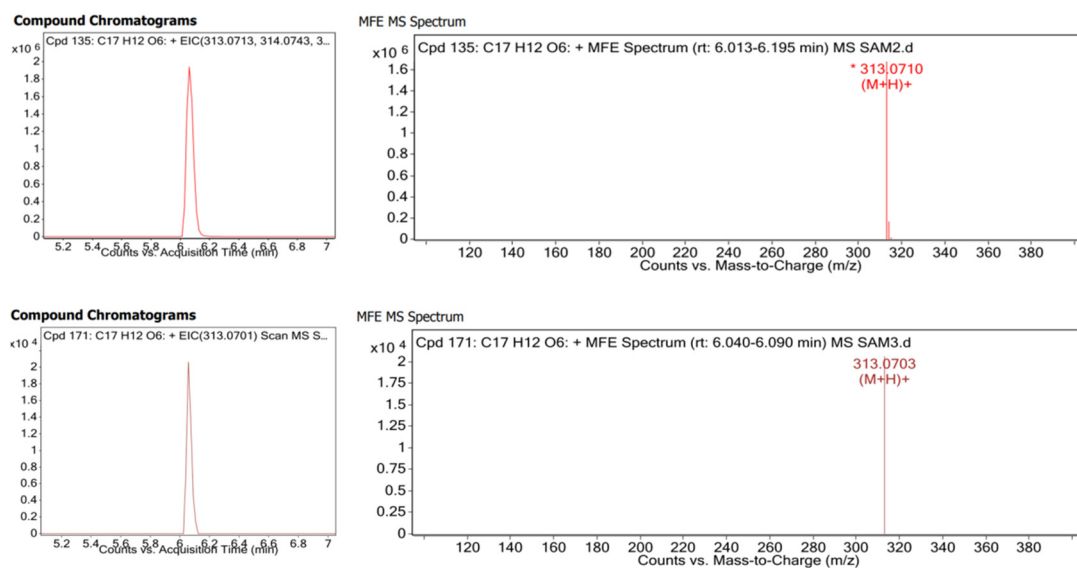

**Supplementary Figure S1.** Mass spectra of the removal of AFB1 mediated by WKGs. HPLC-Q-TOF-MS analyzed the content of AFB1 in brown sugar solution supplemented with 2  $\mu\text{g/mL}$  AFB1(up) and co-incubation cultures of 20% of WKGs and 2  $\mu\text{g/mL}$  AFB1 in brown sugar solution for 30 min (down).

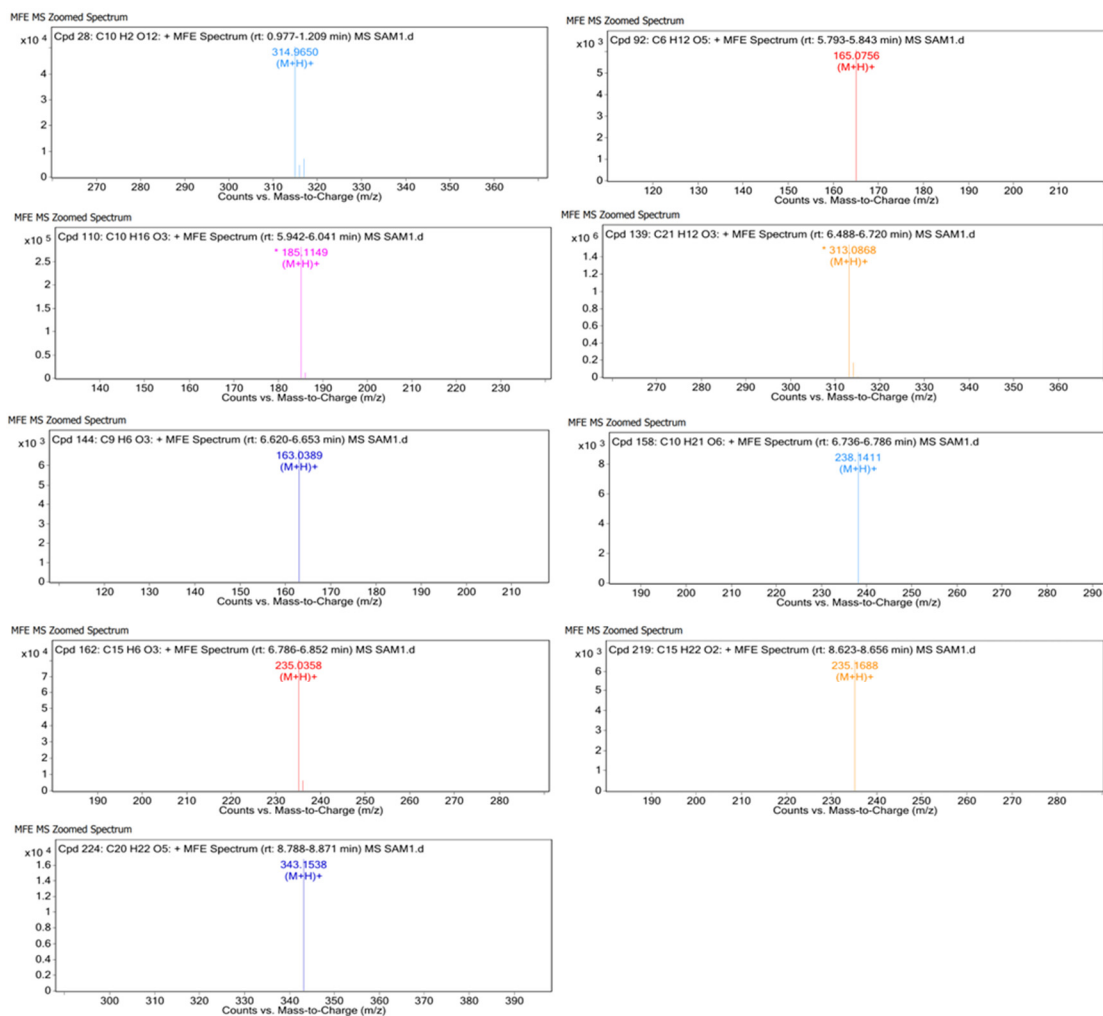

**Supplementary Figure S2.** Mass spectra of degradation products for AFB1 by WKGs.
